# Supplementary material
Source: PubMed Central journal article supplement (PMC4066384)
Supplement: NIHMS591415-supplement-01.pdf [file NIHMS591415-supplement-01.pdf]

strain *Pst* DC3000 and avirulent strain *Pst* DC3000 (*avrRpt2*) (all pathogen suspensions are  $2 \times 10^7$  cfu/mL). Leaf samples were collected for lipid profiling 24 h post inoculation. Values are means  $\pm$  SE (n = 5). Different letters indicate sample groups with significant differences (P < 0.05) from each other.

(A) LPC species from Col-0, *pld $\beta$ 1-1*, and *pld $\beta$ 1* complementation (COM) plants under different treatments.

(B) LPE species from Col-0, *pld $\beta$ 1-1*, and *pld $\beta$ 1* complementation (COM) plants under different treatments.

(B) LPG species from Col-0, *pld $\beta$ 1-1*, and *pld $\beta$ 1* complementation (COM) plants under different treatments.

**Supplemental data Table S1. Real time PCR primers**

| Primer Names          | 5' - 3' sequences            | Genes     | Fragment size (bp) |
|-----------------------|------------------------------|-----------|--------------------|
| PLD $\beta$ 1 Forward | CGGAGGTAACATTGTCCGGATC       | AT2G42010 | 141                |
| PLD $\beta$ 1 Reverse | TCTCCCACCCTCTTATTATCA        |           |                    |
| PR1 F                 | TTCTTCCCTCGAAAGCTCAA         | AT2G14610 | 173                |
| PR1 R                 | AAGGCCACCAGAGTGTATG          |           |                    |
| UBQ5 F                | ACCAAGCCGAAGAAGATCA          | AT3G62250 | 194                |
| UBQ5 R                | GTAAACGTAGGTGAGTCCA          |           |                    |
| PDF12 F               | CTT GTT CTC TTT GCT GCT TTCG | AT5G44420 | 154                |
| PDF12 R               | CAT GTT TGG CTC CTT CAA G    |           |                    |
| LOX2 F                | TGAAAGATTCAAAGGCAAGCT        | AT3G45140 | 151                |
| LOX2 R                | GAACACCATTCCGGTAACA          |           |                    |
| AOS F                 | CATGTGTTGTGGTCGAATGGA        | AT5G42650 | 174                |
| AOS R                 | ATTAACGGAGCTTCCTAACG         |           |                    |
| Tubulin8 F            | GACATTTGGCTATGTGTGATG        | AT5G23860 | 136                |
| Tubulin8 R            | CAGATGGAATCACCAACGTTT        |           |                    |
| PLD $\beta$ 2F        | CTGCTAGATGATTGCTTTGT         | AT4G00240 | 108                |
| PLD $\beta$ 2R        | CTCCGACACTTCCTCACTC          |           |                    |
